# Supplementary material for: Meiotic cohesin complexes are essential for the formation of the axial element in mice
Source: PubMed Central journal article supplement — J Cell Biol. 2012 Jun 25;197(7):877–85. doi: 10.1083/jcb.201201100 (PMC3384418; doi:10.1083/jcb.201201100), 2012-06-25
Supplement: supp_jcb.201201100_JCB_201201100_sm.pdf [file supp_jcb.201201100_JCB_201201100_sm.pdf]

Llano et al., <http://www.jcb.org/cgi/content/full/jcb.201201100/DC1>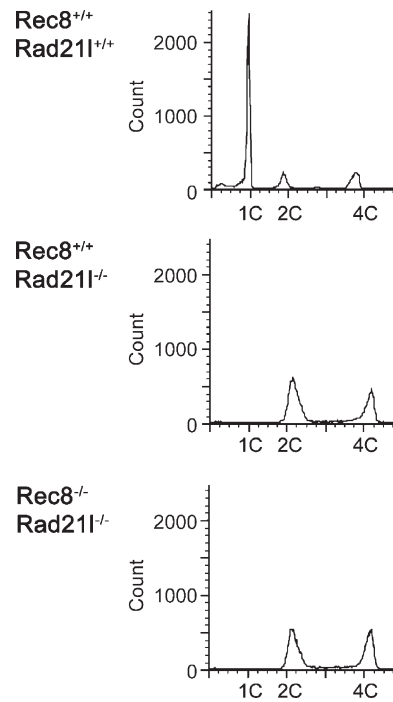

Figure S1. **The absence of RAD21L and REC8 does not impair DNA replication.** DNA content of the cells from the seminiferous tubules in the dKO-*kls*. FACS analysis of cells from whole seminiferous tubules from wild-type, *Rad21<sup>-/-</sup>*, and dKO-*kls* testes showing the presence of the tetraploid compartment in the three genotypes ( $n = 2$ ). In addition, both *Rad21<sup>-/-</sup>* and dKO-*kls*, but not wild type, lack the haploid compartment as a result of the prophase arrest at stage IV.

Table S1. **Number of early recombination-associated foci in spermatocytes and the weight of testis from wild-type and dKO-*kls* mice**

| Genotype        | Weight of testis      | $\gamma$ -H2AX fluorescence | No. of RAD51 foci in leptoneuma | No. of DMC1 foci in leptoneuma | No. of RPA foci in leptoneuma |
|-----------------|-----------------------|-----------------------------|---------------------------------|--------------------------------|-------------------------------|
|                 | <i>mg</i>             | <i>arbitrary unit</i>       |                                 |                                |                               |
| Wild type       | 103 $\pm$ 8; $n = 8$  | 92.3 $\pm$ 56.2; $n = 40$   | 110.7 $\pm$ 31.8; $n = 35$      | 51.8 $\pm$ 20.9; $n = 40$      | 18.3 $\pm$ 9.7; $n = 36$      |
| dKO- <i>kls</i> | 30 $\pm$ 3; $n = 8^a$ | 86.7 $\pm$ 29.6; $n = 43$   | 13.7 $\pm$ 5.4; $n = 35^a$      | 53.9 $\pm$ 19.4; $n = 40$      | 55.5 $\pm$ 18.7; $n = 38^a$   |

<sup>a</sup>Significantly different from wild type ( $P < 0.05$ ).
